# Supplementary material for: Application of single-incision laparoscopic-assisted technique for the closure of end colostomy with intestinal shortening
Source: Research Square preprint supplement (doi:10.21203/rs.3.rs-2716267/v1), 2023-03-23
Supplement: Supplementary file 1 [file 881c500e45d464540a60eb89.docx]

Supplementary Table 1. Modified American Society for Reproductive Medicine (ASRM) Adhesions classification criteria

| The nature and extent of intraoperative adhesions * | Adhesion classification | Grading (points) |
| --- | --- | --- |
| No adhesion | Nothing | 0 |
| Membranous，＜ 25% | Mild | 1 |
| Membranous，25% - 50% | Mild | 2 |
| Membranous，≥ 51% | Moderate | 3 |
| Pyknotic，＜ 25% | Moderate | 4 |
